# Supplementary material for: ZYBT1, a potent, irreversible Bruton’s Tyrosine Kinase (BTK) inhibitor that inhibits the C481S BTK with profound efficacy against arthritis and cancer
Source: PubMed Central journal article supplement — Pharmacol Res Perspect. 2020 Aug 13;8(4):e00565. doi: 10.1002/prp2.565 (PMC7424564; doi:10.1002/prp2.565), 2020-08-13
Supplement: PRP2-8-e00565-s001.pdf [file PRP2-8-e00565-s001.pdf]

**Supplementary Table 1: Pharmacokinetic data for ZYBT1 in Wistar rats and mice**

| <b>Species</b> | <b>Route/Dose</b>    | <b>T<sub>max</sub><br/>(h)</b> | <b>C<sub>max</sub><br/>(ng/mL)</b> | <b>AUC<sub>last</sub><br/>(ng.h/mL)</b> |
|----------------|----------------------|--------------------------------|------------------------------------|-----------------------------------------|
| Wistar rat     | PO; 3 mg/kg          | 0.25                           | 649                                | 908                                     |
|                | PO; 10 mg/kg         | 2.00                           | 820                                | 2730                                    |
|                | PO; 30 mg/kg         | 2.00                           | 1264                               | 4716                                    |
|                | PO; 100 mg/kg        | 4.00                           | 2877                               | 13185                                   |
|                | PO; 300 mg/kg        | 4.00                           | 6141                               | 80662                                   |
| SCID mice      | PO; 0.2 mg/kg        | 0.25                           | 10.48                              | 8.63                                    |
|                | PO; 1 mg/kg          | 0.25                           | 61.8                               | 174.80                                  |
|                | PO; 3 mg/kg          | 0.25                           | 703.04                             | 588.03                                  |
|                | PO; 5 mg/kg          | 1                              | 429.03                             | 1124.68                                 |
|                | PO; 15 mg/kg,<br>BID | 8.50                           | 6272.60                            | 13476.17                                |

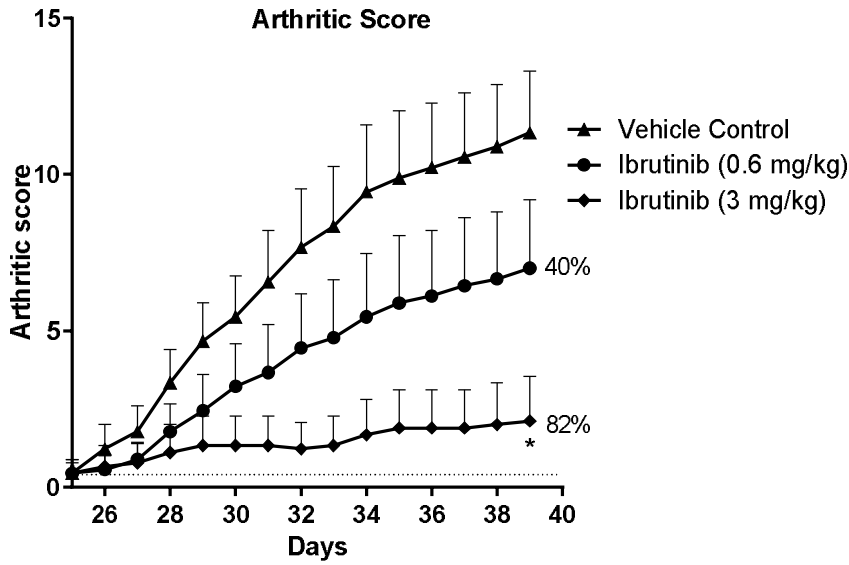

**Supplemental Figure S1. Effect of ibrutinib on clinical score in collagen-induced arthritis (CIA) model.** Mice with established CIA were divided into separate groups consisting of 10 mice each. Groups were treated vehicle or ibrutinib (0.6 & 3mg/kg, QD) for 14 consecutive days. The data represent the mean arthritic scores. Error bars represent SEM. \*, P < 0.05 when compared with vehicle control

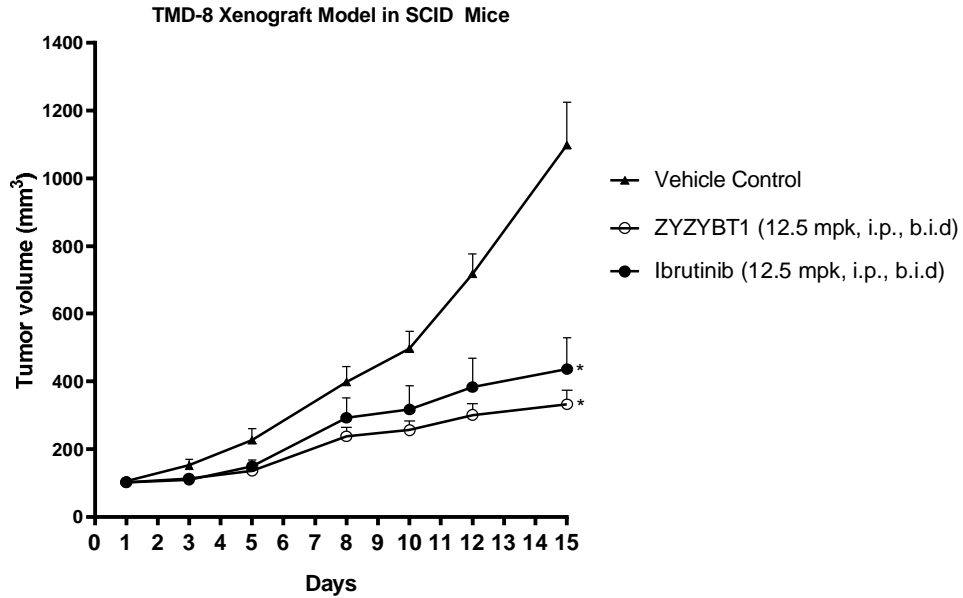

**Supplemental Figure S2. Suppression of tumor volume in TMD8 DLBCL xenograft model by ZYBT1 and ibrutinib.** Mice with established tumor reaching around 100 mm<sup>3</sup> were divided into different groups of 10 mice each. Groups were untreated vehicle or treated with ZYBT1 or ibrutinib (12.5 mg/kg, BID, intra peritoneal) for 14 consecutive days. The data represents the mean tumor volume. Error bars represent SEM. \*, P < 0.05 when compared with vehicle control.

TMD-8 Xenograft Model in SCID Mice

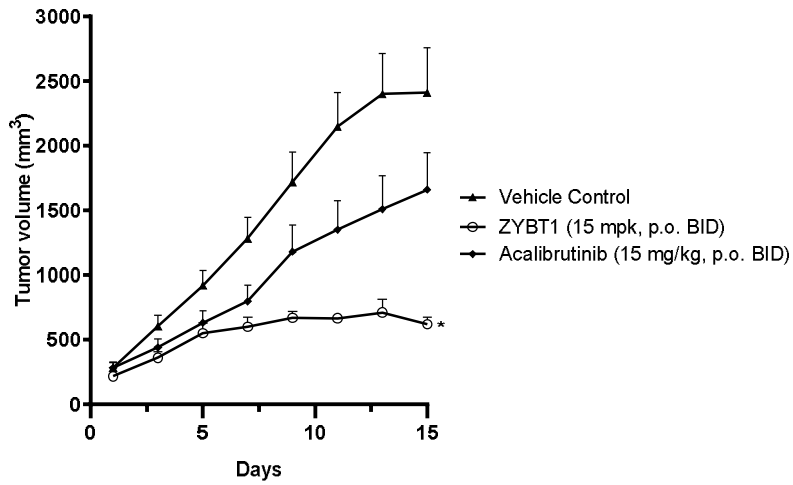

**Supplemental Figure S3. Suppression of tumor volume in TMD8 DLBCL xenograft model by ZYBT1 and acalibrutinib.** Mice with established tumor reaching around 250 mm<sup>3</sup> were divided into different groups of 10 mice each. Groups were untreated vehicle or treated with ZYBT1 or acalibrutinib (15 mg/kg, BID, p.o.) for 14 consecutive days. The data represents the mean tumor volume. Error bars represent SEM. \*, P < 0.05 when compared with vehicle control

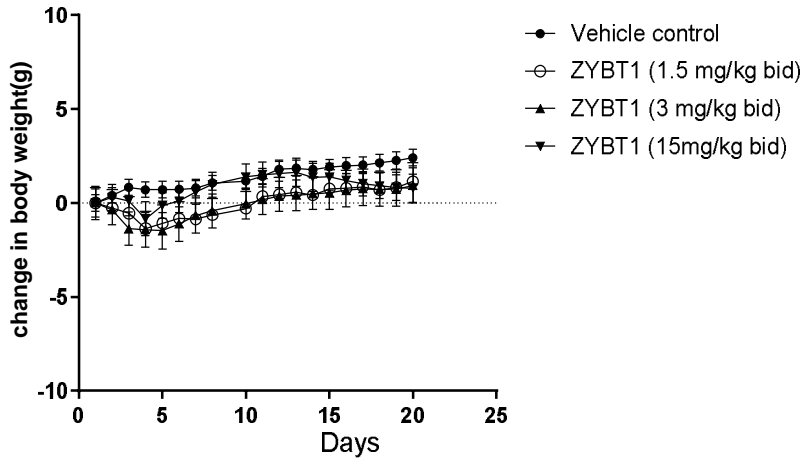

**Supplemental Figure S4: Effect of ZYBT1 on change in body weight in TMD8 DLBCL xenograft model by ZYBT1.** Mice with established tumor reaching around 100 mm<sup>3</sup> were divided into different groups of 10 mice each. Groups were untreated vehicle or treated with ZYBT1 (1.5, 3 & 15 mg/kg, p.o, BID) for 20 consecutive days. The data represents the mean body weight. Error bars represent SEM. \*, P < 0.05 when compared with vehicle control

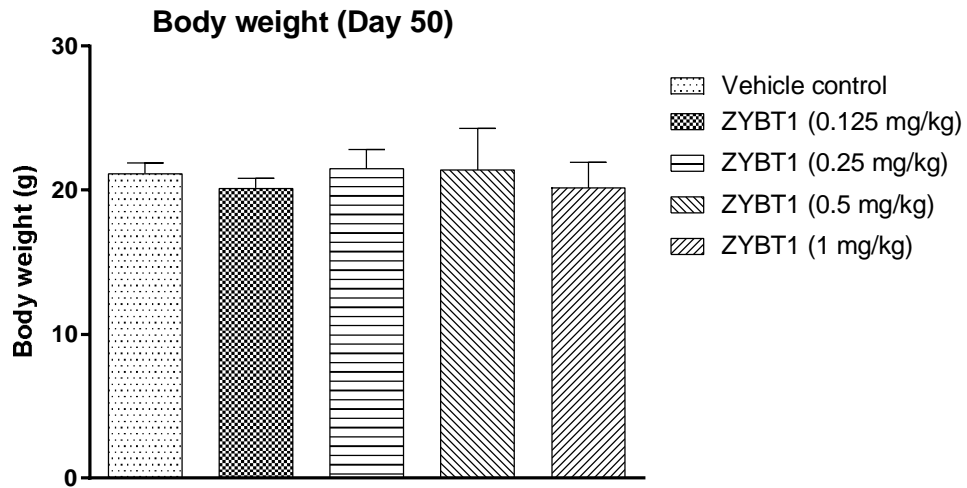

**Supplemental Figure S5: Effect of ZYBT1 on body weight after three weeks of treatment in collagen-induced arthritic mice model.** Mice with established CIA were divided into separate groups consisting of 10 mice each. Groups were treated vehicle or ZYBT1 (0.125, 0.25, 0.5 & 1 mg/kg, OD) for three weeks. The data represent the mean body weight. Error bars represent SEM. \*,  $P < 0.05$  when compared with vehicle control
